# Supplementary material for: Formation of colorectal liver metastases induces musculoskeletal and metabolic abnormalities consistent with exacerbated cachexia
Source: JCI journal article supplement (doi:10.1172/jci.insight.136687), 2020-04-16
Supplement: sd1 [file 1]

## Formation of colorectal liver metastases induces musculoskeletal and metabolic abnormalities consistent with exacerbated cachexia

Joshua R. Huot, Leah J. Novinger, Fabrizio Pin, Ashok Narasimhan, Teresa A. Zimmers, Thomas M. O'Connell, Andrea Bonetto

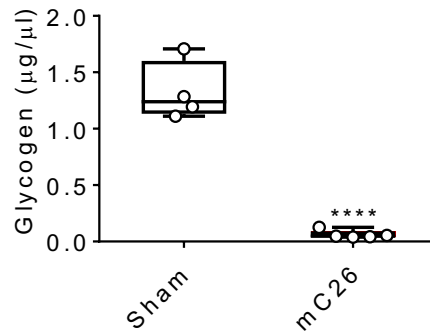

**Figure S1.** mC26 hosts have reduced liver glycogen. Liver glycogen ( $\mu\text{g}/\mu\text{l}$ ) of CD2F1 male mice (12-week old) intrasplenically injected with C26 tumor cells (250,000 cells/mouse in sterile PBS: mC26) or an equal volume of vehicle (Sham) ( $n=4-5$ ). Data are expressed as means  $\pm$  SD. Significance of the differences: \*\*\*\* $p<0.0001$  vs. Sham.

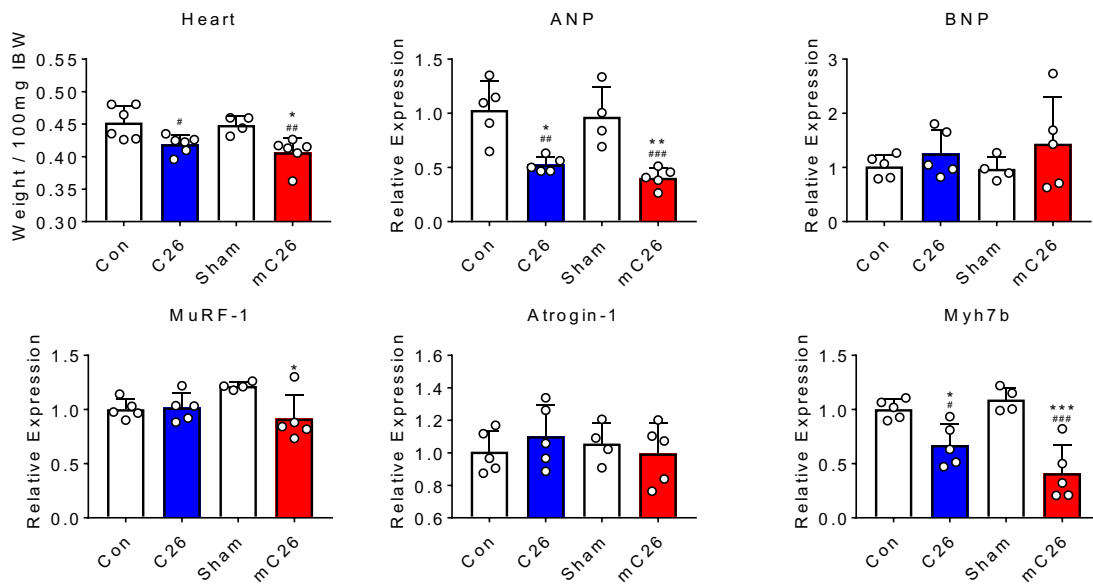

**Figure S2.** Cardiac cachexia in C26 and mC26 tumor hosts. Heart weights normalized to initial body weight (IBW) and gene expression levels for ANP, BNP, MuRF-1, Atrogin-1 and Myh7b measured by quantitative real-time PCR and normalized to TBP levels in CD2F1 male mice (8-week old) either injected with C26 tumor cells subcutaneously (1,000,000 cells/mouse in sterile PBS: C26) or intrasplenically (250,000 cells/mouse in sterile PBS: mC26). Control (Con for C26) and Sham (controls for mC26) were injected with an equal volume of vehicle ( $n=4-6$ ). Data are expressed as mean  $\pm$  SD. Significance of the differences: # $p<0.05$ , ## $p<0.01$ , ### $p<0.001$  vs. Con; \* $p<0.05$ , \*\* $p<0.01$ , \*\*\* $p<0.001$  vs. Sham.
